# Supplementary material for: Engaging the Senses: The Association of Urban Green Space with General Health and Well-Being in Urban Residents
Source: MDPI journal article supplement (doi:10.3390/su13137322), 2021-06-30
Supplement: s1 [file s1]

Archive with 1 entries (1 files):
- sustainability-1255553-supplementary.pdf
